# Supplementary material for: An unexpected catalyst dominates formation and radiative forcing of regional haze
Source: PubMed Central journal article supplement — Proc Natl Acad Sci U S A. 2020 Feb 10;117(8):3960–6. doi: 10.1073/pnas.1919343117 (PMC7049161; doi:10.1073/pnas.1919343117), 2020-02-10
Supplement: pnas.1919343117.sapp.pdf [file pnas.1919343117.sapp.pdf]

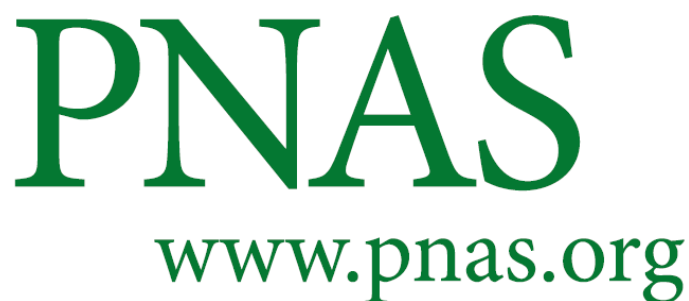

5 **Supporting Information for:**

6 **An unexpected catalyst dominates formation and radiative forcing of regional haze**

7 Fang Zhang<sup>a,b</sup>, Yuan Wang<sup>c</sup>, Jianfei Peng<sup>b</sup>, Lu Chen<sup>a</sup>, Yele Sun<sup>d</sup>, Lian Duan<sup>b,e</sup>, Xinlei Ge<sup>f</sup>, Yixin  
8 Li<sup>g</sup>, Jiayun Zhao<sup>g</sup>, Chao Liu<sup>h</sup>, Xiaochun Zhang<sup>i</sup>, Gen Zhang<sup>i</sup>, Yuepeng Pan<sup>d</sup>, Yuesi Wang<sup>d</sup>,  
9 Annie L. Zhang<sup>j</sup>, Yuemeng Ji<sup>k</sup>, Gehui Wang<sup>l</sup>, Min Hu<sup>m</sup>, Mario J. Molina<sup>n,1</sup>, Renyi Zhang<sup>b,g,1</sup>

10 <sup>1</sup>Corresponding authors. Email: [renyi-zhang@tamu.edu](mailto:renyi-zhang@tamu.edu) (R.Z.); [mjmolina@ucsd.edu](mailto:mjmolina@ucsd.edu) (M.J.M.)

11 **This PDF file includes:**

12 Tables S1 and S2 (Tables S1 and S2 are referenced in the main manuscript)

13 Figs. S1 to S7 (Figs. S1 through S7 are referenced in the main manuscript)

14

15

16

17

18

19

20

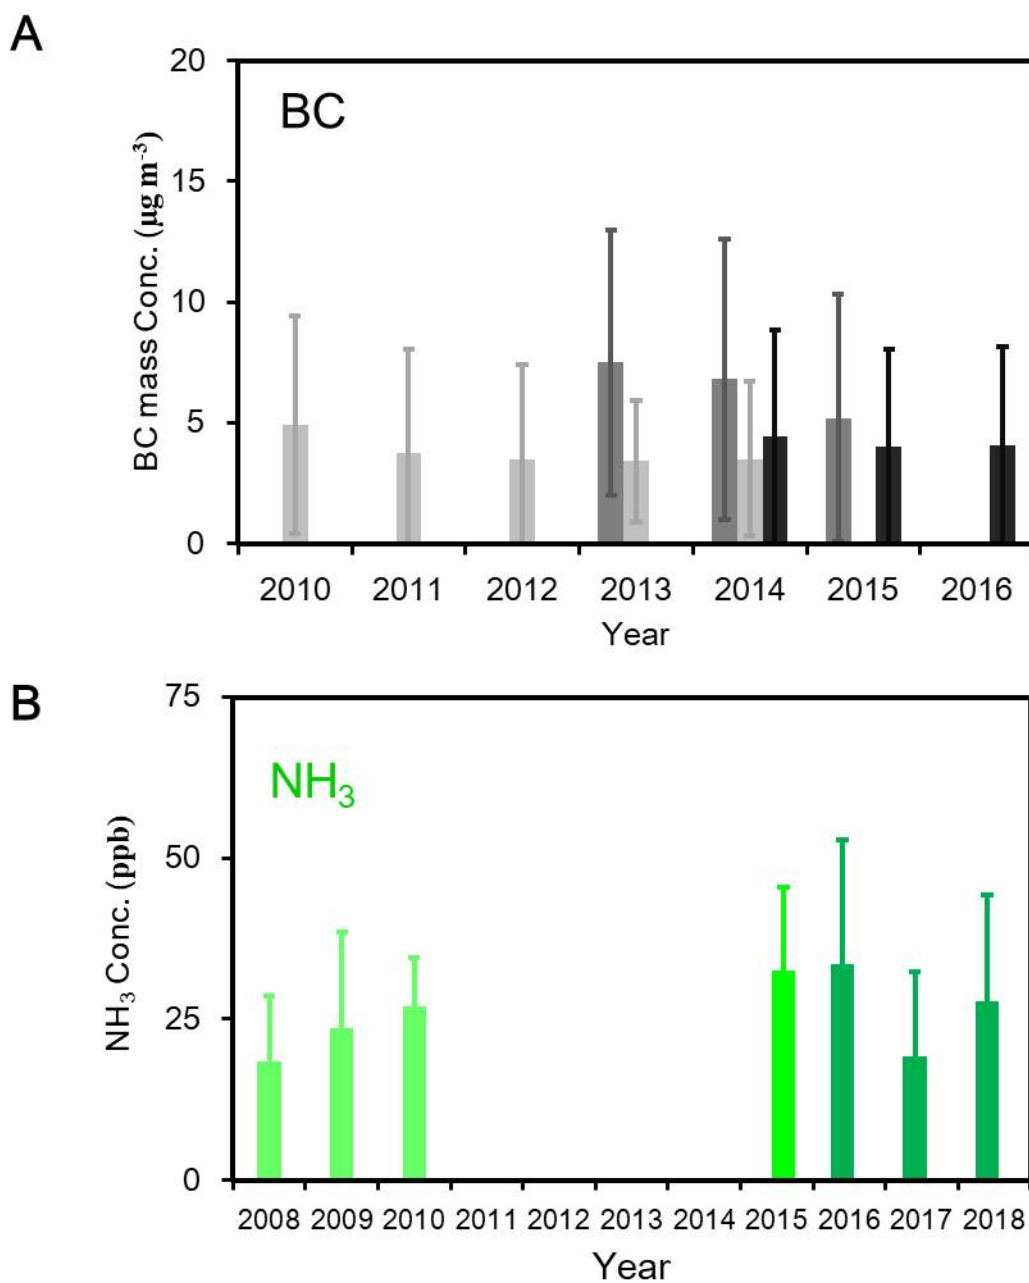

21  
 22 **Fig. S1. Long-term trends of BC and  $\text{NH}_3$  in Beijing.** (A and B) Measurements of BC (A) and  
 23  $\text{NH}_3$  (B). In (A), the BC mass concentrations marked by light-grey, grey, and black columns are  
 24 taken from Liu et al. (39), Emilenko et al. (40), and measurements at PKU (16), respectively. In  
 25 (B), the  $\text{NH}_3$  concentrations marked by light-green, green, and dark-green columns are taken from  
 26 Meng et al. (41), measurements at CMA, and Wang et al. (13), respectively.

27

28

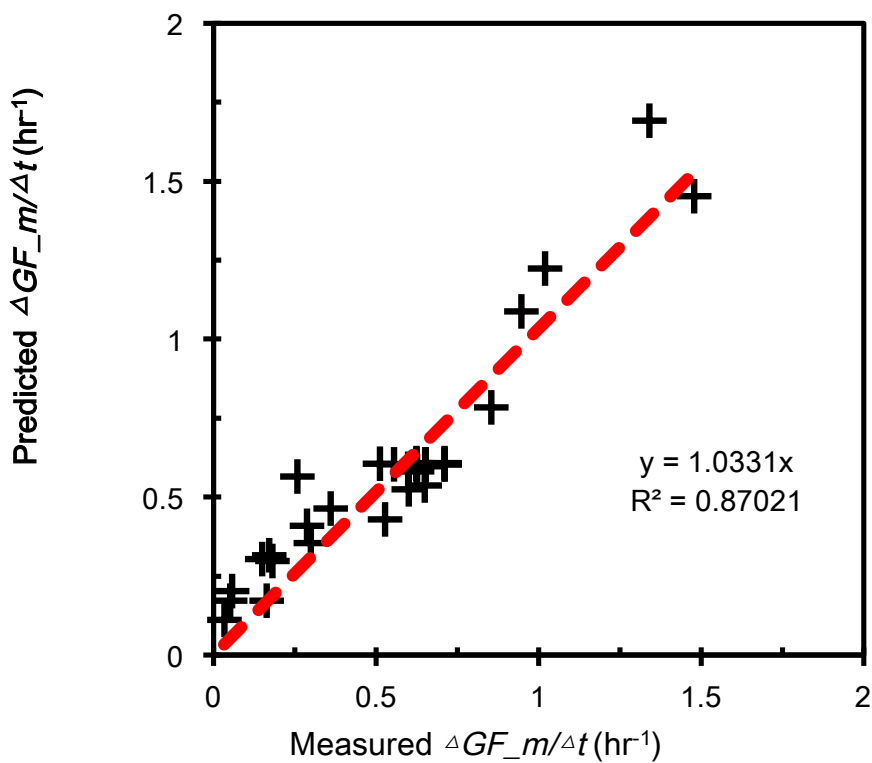

29

30 **Fig. S2. Parameterization of the BC-catalyzed sulfate production rate.** Comparison between  
 31 the calculated and measured growth rates from the experimental results shown in Fig. 2, with a  
 32 correlation coefficient of 0.87. The calculated value is based on the parameterization from  
 33 laboratory experiments (see Methods).

34

35

36

37

38

39

40

41

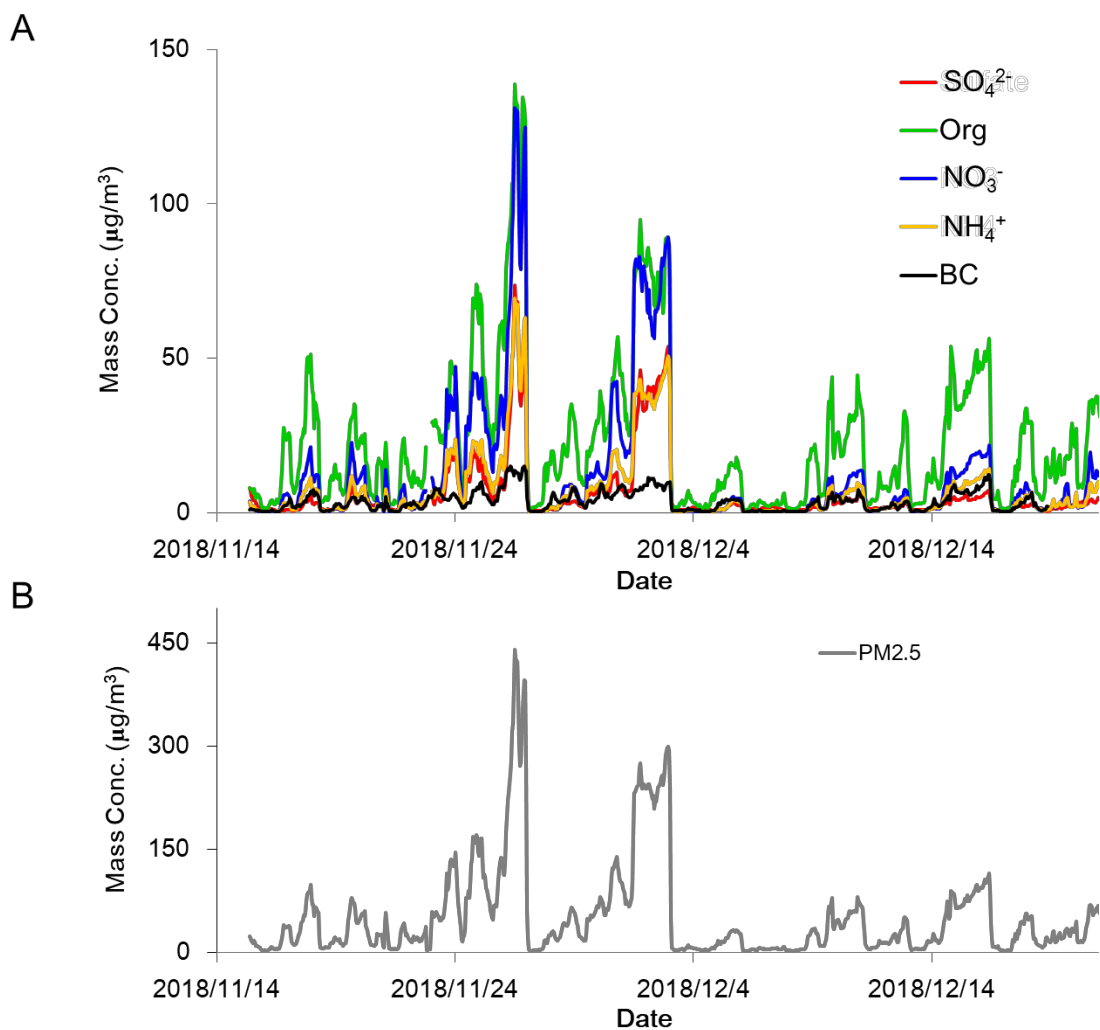

42  
 43 **Fig. S3.  $\text{PM}_{2.5}$  and chemical composition during 2018 winter Beijing.** (A) Measurements of  
 44 various the chemical compositions in  $\text{PM}_{2.5}$  by AMS from November 15 to December 25, 2018.  
 45 (B)  $\text{PM}_{2.5}$  during the same period. The average  $\text{PM}_{2.5}$  mass concentration is  $53 \mu\text{g m}^{-3}$ , and the  
 46  $\text{PM}_{2.5}$  ranges from less than 10 to  $440 \mu\text{g m}^{-3}$  during this period. There were two heavy haze  
 47 episodes on November 27-30 and December 1-3, with the maximum  $\text{PM}_{2.5}$  mass concentration of  
 48  $150$  and  $300 \mu\text{g m}^{-3}$ , respectively.

49  
 50  
 51  
 52

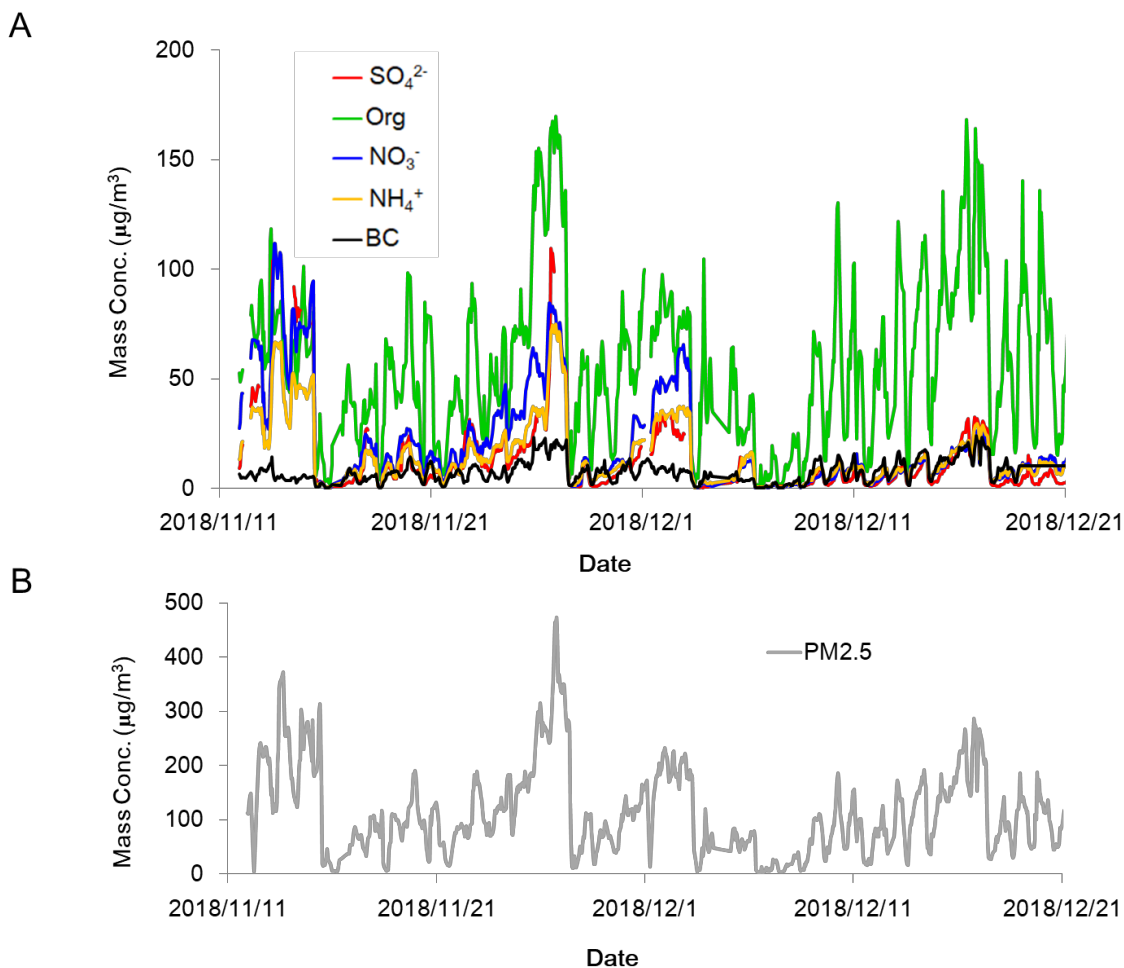

53  
 54 **Fig. S4.  $\text{PM}_{2.5}$  and chemical composition in 2018 winter Gucheng.** (A) Measurements of the  
 55 various chemical compositions in  $\text{PM}_{2.5}$  by AMS from November 11 to December 21, 2018. (B)  
 56  $\text{PM}_{2.5}$  during the same period. The average  $\text{PM}_{2.5}$  mass concentration is  $112 \mu\text{g m}^{-3}$ , and the  $\text{PM}_{2.5}$   
 57 ranges from less than 10 to  $490 \mu\text{g m}^{-3}$  during the period. There were two heavy haze episodes on  
 58 November 24-26 and November 28 - December 1, with the maximum  $\text{PM}_{2.5}$  mass concentration  
 59 of 224 and  $473 \mu\text{g m}^{-3}$ , respectively.

60

61

62

63

64

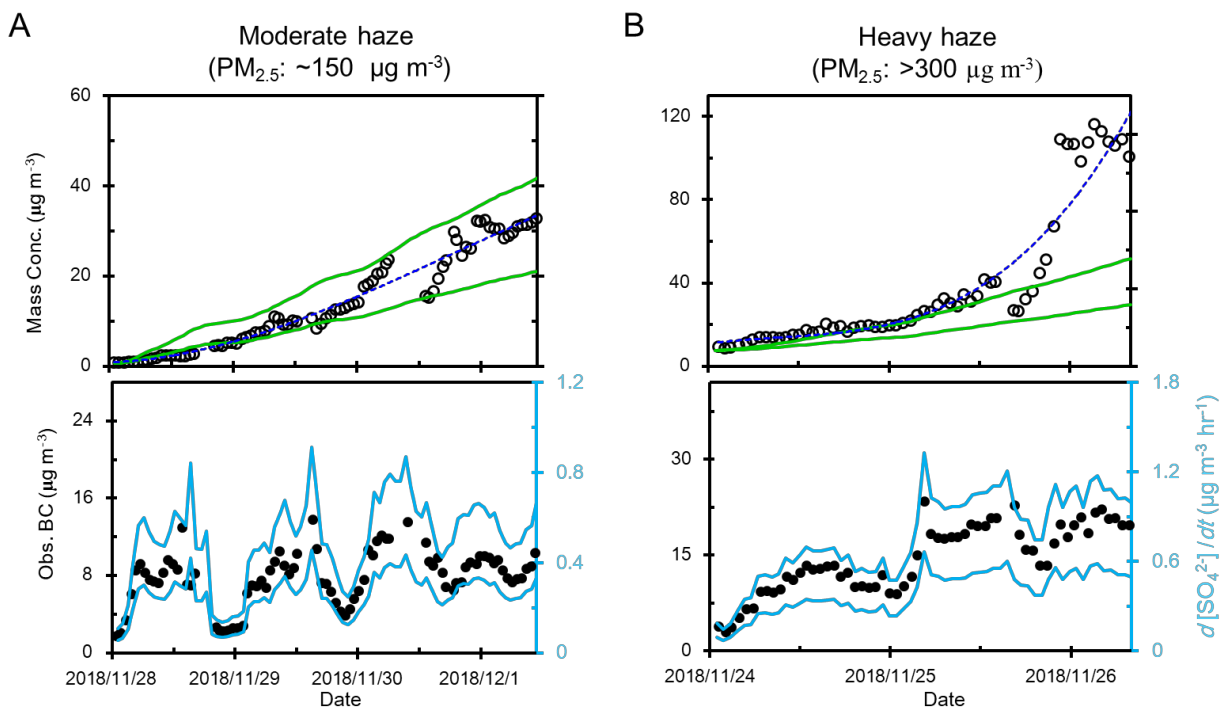

65  
 66 **Fig. S5. Quantifying BC-catalyzed sulfate formation in Gucheng.** (A and B) Calculated (green  
 67 lines) and measured (circles and dashed line) sulfate mass concentrations during a moderate day  
 68 and a heavy haze day, respectively. (C and D) BC mass concentration (left axis) and sulfate  
 69 formation rate ( $d[\text{SO}_4^{2-}]/dt$ , right axis) during a moderate day and a heavy haze day, respectively.  
 70 The range of the BC estimation (green and blue lines) are derived by assuming that 40% and 20%  
 71 of the measured BC mass concentration are freshly emitted (34). Since there were no  
 72 measurements of gaseous  $\text{NH}_3$  during the observation period in Gucheng, we assumed a  $\text{NH}_3$   
 73 concentration of 20 and 30 ppb during moderate and heavy haze periods, respectively, based on  
 74 previous data in China (4,13).

75

76

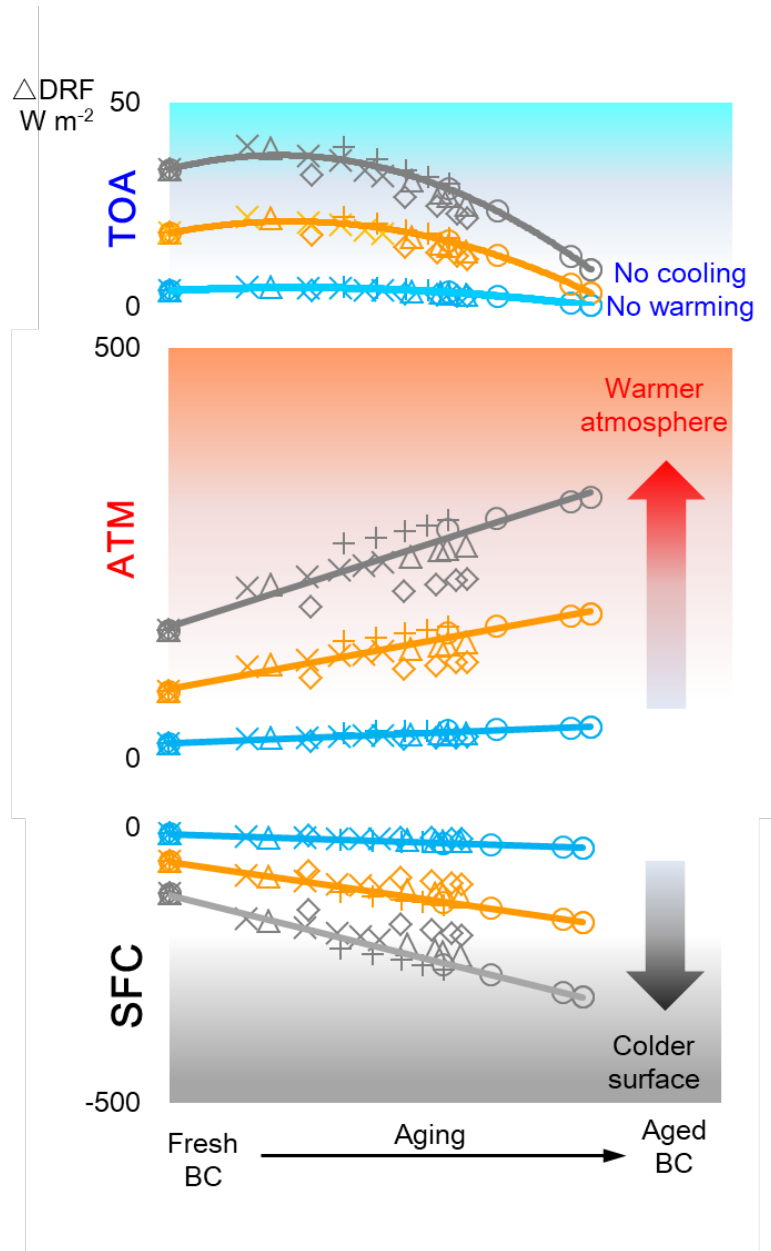

77

78 **Fig. S6.  $\Delta$ DRF dependence on BC aging at TOA, ATM and SFC on clean/light haze (blue**  
 79 **lines), moderate haze (orange lines), and heavy haze (grey lines) days. The ambient average BC**  
 80 **concentrations are assumed to be 2, 5, and 10  $\mu\text{g m}^{-3}$ , on clean/light haze, moderate haze, and**  
 81 **heavy haze days, respectively. A core-shell Mie model is adopted (35). The calculation is made**  
 82 **at 532 nm with a unit of  $\text{W m}^{-2} \mu\text{m}^{-1}$ . The initial fresh BC diameter is 150 nm.**

83

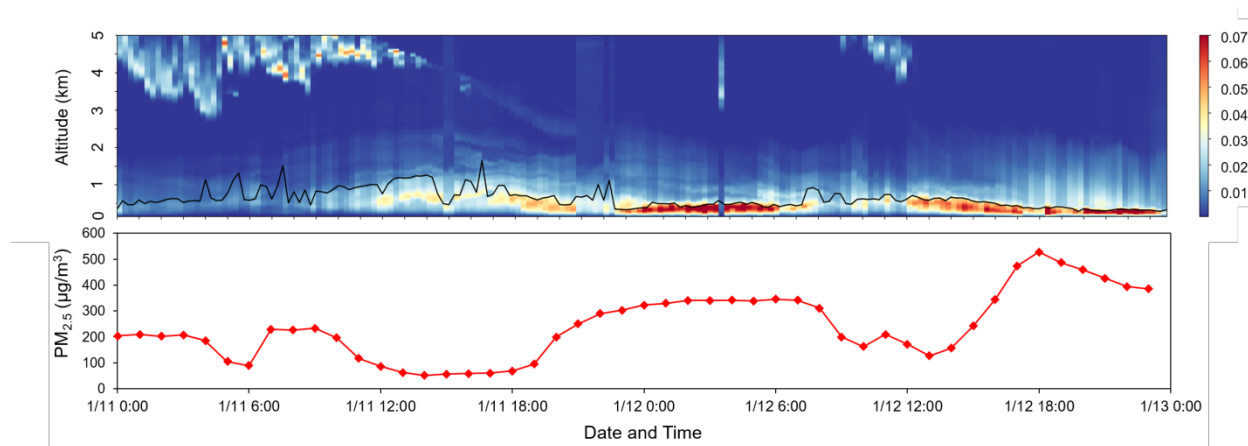

84  
 85 **Fig. S7. PBL and  $PM_{2.5}$  in Beijing.** (A) The PBL height (solid line) derived from Lidar  
 86 measurements during a haze event (January 11-12, 2019). (B) Mass concentration of  $PM_{2.5}$  during  
 87 the same period.

88  
 89  
 90  
 91



92 **Table S1.** Measured Gfm (within 2 hrs) and derived  $d(\text{Gfm-1})/dt$  (in  $\text{hr}^{-1}$ ) at variable  
 93 concentrations of  $\text{SO}_2$ ,  $\text{NO}_2$ , and  $\text{NH}_3$  as well as RH.

| Variables                                 | Conc. (ppb) | Gfm (within 2 hrs) | $d(\text{Gfm-1})/dt$<br>( $\text{hr}^{-1}$ ) |
|-------------------------------------------|-------------|--------------------|----------------------------------------------|
| $\text{SO}_2^a$                           | 7.5         | 2.18               | 0.62                                         |
|                                           | 37.5        | 2.07               | 0.60                                         |
|                                           | 90*         | 1.40               | 0.20                                         |
|                                           | 90*         | 1.80               | 0.40                                         |
|                                           | 180*        | 1.40               | 0.20                                         |
|                                           | 300         | 2.09               | 0.55                                         |
|                                           | 375         | 2.23               | 0.65                                         |
|                                           | 750         | 2.38               | 0.71                                         |
|                                           | 750         | 2.26               | 0.62                                         |
|                                           | 37.5        | 0.95               | 0.02                                         |
| $\text{NO}_2^b$                           | 37.5        | 1.26               | 0.16                                         |
|                                           | 180*        | 1.40               | 0.20                                         |
|                                           | 375         | 2.23               | 0.65                                         |
|                                           | 375         | 2.38               | 0.71                                         |
|                                           | 375         | 2.26               | 0.62                                         |
|                                           | 750         | 2.93               | 0.95                                         |
| $\text{NH}_3^c$                           | 100         | 1.59               | 0.30                                         |
|                                           | 180*        | 1.40               | 0.20                                         |
|                                           | 300         | 1.40               | 0.20                                         |
|                                           | 500         | 2.23               | 0.65                                         |
|                                           | 1000        | 2.64               | 0.85                                         |
| Relative<br>humidity<br>(RH) <sup>d</sup> | 12%         | 1.00               | 0.00                                         |
|                                           | 21%         | 1.19               | 0.10                                         |
|                                           | 30%         | 1.36               | 0.18                                         |
|                                           | 41%         | 1.59               | 0.29                                         |
|                                           | 43%         | 2.02               | 0.51                                         |
|                                           | 56%         | 2.34               | 0.67                                         |
|                                           | 68%         | 2.23               | 0.62                                         |
|                                           | 70%         | 2.26               | 0.63                                         |
|                                           | 70%         | 2.38               | 0.69                                         |
| 81%                                       | 2.20        | 0.60               |                                              |
|                                           | 95%         | 2.26               | 0.63                                         |

94 <sup>a</sup>With  $\text{NO}_2$ ,  $\text{NH}_3$  and RH of 375 ppb, 500 ppb, and 70% for each experiment ;

95 <sup>b</sup>With  $\text{SO}_2$ ,  $\text{NH}_3$  and RH of 375 ppb, 500 ppb and 70% for each experiment;

96 <sup>c</sup>With  $\text{SO}_2$ ,  $\text{NO}_2$ , and RH of 375 ppb, 375 ppb and 70% for each experiment;

97 \*The data were not included in deriving the parameterization, but were used for validating the  
 98 performance of the fitted parameterization. The experiments were performed in the  $\text{SO}_2$ ,  $\text{NO}_2$ ,  
 99  $\text{NH}_3$  concentrations of 180-500 ppb and RH of 70%-90%.

100

**Table S2. Gaseous and PM pollutants and meteorological parameters in Beijing and Gucheng.**

|                | Chemical components in PM <sub>2.5</sub> and PM <sub>2.5</sub> ( $\mu\text{g m}^{-3}$ ) |            |                              |                              |          |          | Meteorological parameters |         |           | Trace gases (ppb)            |                |         |                 |                 |                 |
|----------------|-----------------------------------------------------------------------------------------|------------|------------------------------|------------------------------|----------|----------|---------------------------|---------|-----------|------------------------------|----------------|---------|-----------------|-----------------|-----------------|
|                | SO <sub>4</sub> <sup>2-</sup>                                                           | Org        | NO <sub>3</sub> <sup>-</sup> | NH <sub>4</sub> <sup>+</sup> | Cl       | BC       | PM <sub>2.5</sub>         | T (°C)  | RH (%)    | Wind<br>(m s <sup>-1</sup> ) | O <sub>3</sub> | CO      | SO <sub>2</sub> | NO <sub>2</sub> | NH <sub>3</sub> |
| <b>Beijing</b> |                                                                                         |            |                              |                              |          |          |                           |         |           |                              |                |         |                 |                 |                 |
| Moderate       |                                                                                         |            |                              |                              |          |          |                           |         |           |                              |                |         |                 |                 |                 |
| haze           | 4.7±3.3                                                                                 | 24.9±12.0  | 11.8±11.2                    | 7.1±5.2                      | 1.1±0.8  | 4.8±2.0  | 54.5±32.5                 | 4.4±2.2 | 34.9±11.5 | 2.1±0.7                      | 3.4±3.3        | 1.1±0.3 | 5.9±3.5         | 43.9±11.3       | 19.6±5.5        |
| Heavy          |                                                                                         |            |                              |                              |          |          |                           |         |           |                              |                |         |                 |                 |                 |
| haze           | 32.6±15.2                                                                               | 68.3±20.8  | 61.9±23.6                    | 33.4±12.6                    | 3.6±1.9  | 8.2±1.7  | 208.1±72.8                | 5.2±1.5 | 72.4±16.1 | 1.9±0.8                      | 5.0±7.0        | 1.7±0.6 | 3.7±2.0         | 60.4±10.1       | 36.1±8.7        |
| <b>Gucheng</b> |                                                                                         |            |                              |                              |          |          |                           |         |           |                              |                |         |                 |                 |                 |
| Moderate       |                                                                                         |            |                              |                              |          |          |                           |         |           |                              |                |         |                 |                 |                 |
| haze           | 14.1±10.8                                                                               | 61.3±22.3  | 24.2±16.6                    | 17.7±10.9                    | 5.1±1.9  | 7.8±2.8  | 128.7±60.3                | 2.1±3.6 | 77.5±18.8 | 0.3±0.5                      | 4.2±4.8        | 1.6±0.5 | 8.0±1.7         | 34.9±7.6        | NA              |
| Heavy          |                                                                                         |            |                              |                              |          |          | 264.0±119.                |         |           |                              |                |         |                 |                 |                 |
| haze           | 40.2±34.8                                                                               | 108.2±43.4 | 52.2±18.6                    | 37.1±19.5                    | 11.6±5.9 | 14.5±5.3 | 9                         | 2.4±4.3 | 81.3±20.1 | 0.6±0.8                      | 5.2±6.6        | 2.2±0.7 | 10.3±5.8        | 49.7±12.6       | NA              |
